# Supplementary material
Source: publisher figshare collection journal article supplement (https://frontiersin.figshare.com/ndownloader/files/25306901)
Supplement: Supplementary file [file 25306901]

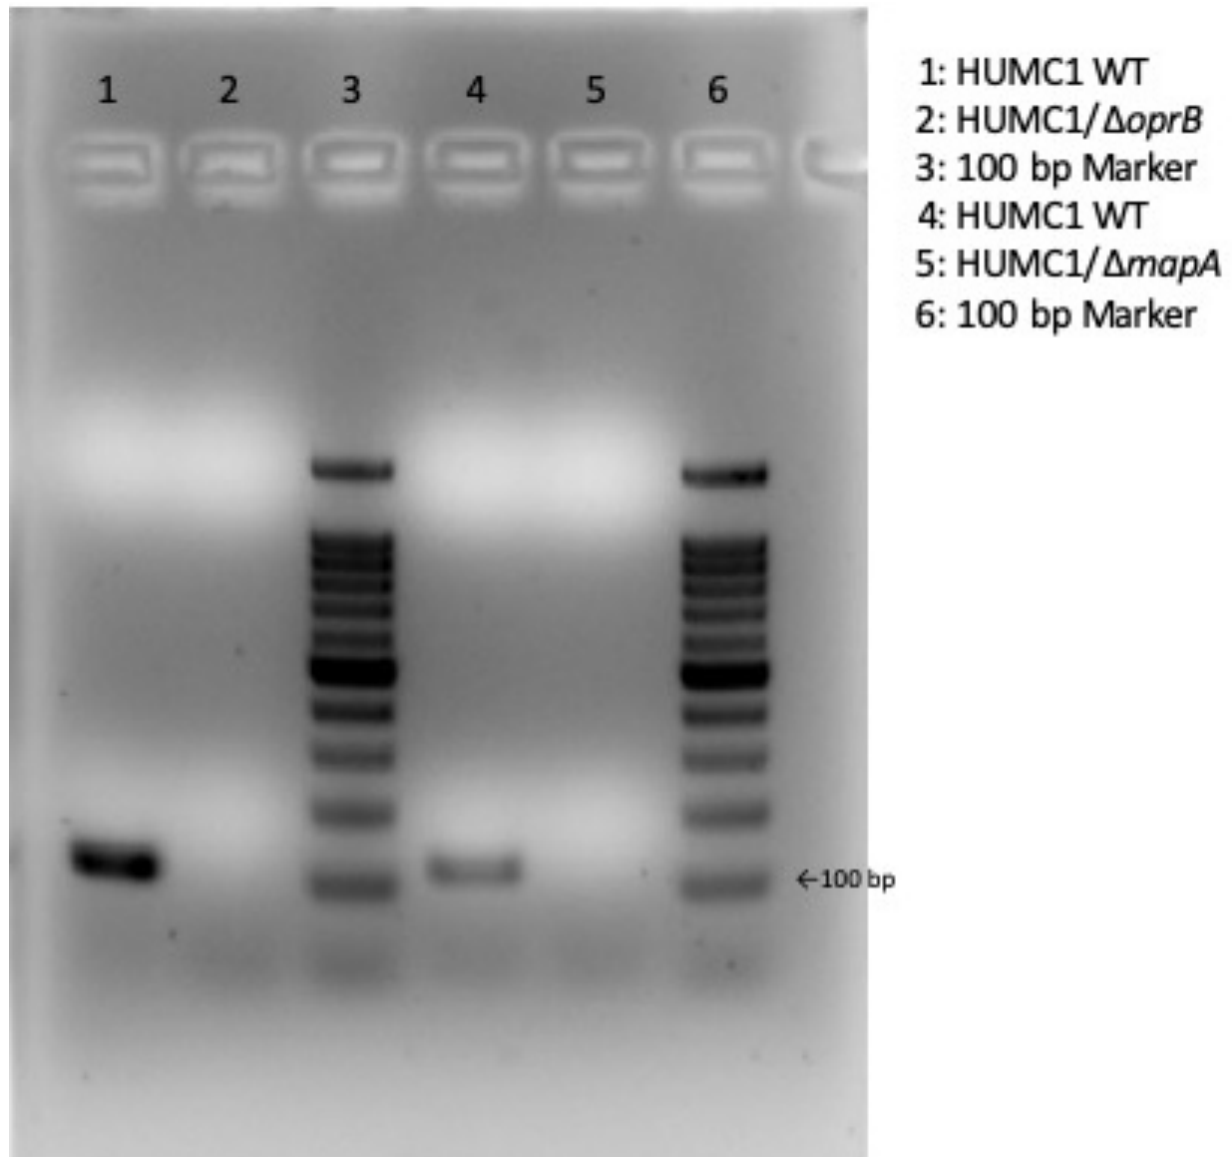

**Supplemental Figure 1:** RT-PCR confirmation of the absence of *oprB* and *mapA* transcript in *A. baumannii* HUMC1 $\Delta oprB$  and HUMC1 $\Delta mapA$  in comparison to the WT. Primers used for the PCR are same that were used for the Q-PCR (1221/22 for *oprB* WT 105 bp; 1318/19 for *mapA* WT 120 bp).
